# Supplementary material for: Covalent and ionic bonding in bi- and tricyclic Group 15 amides: equidistant P–I and As–I bonds and fluxional cations
Source: Royal Society of Chemistry journal article supplement (doi:10.1039/d0dt01163k), 2020-01-01
Supplement: d0dt01163k1.pdf [file d0dt01163k1.pdf]

Supporting Information for

**Covalent and ionic bonding in bi- and tricyclic Group 15 amides: equidistant P–I and As–I bonds and fluxional cations**

Joseph T. Musongong,<sup>a</sup> Mathew E. Otang,<sup>a</sup> Brandon L. Mash,<sup>b</sup> Matthias Zeller,<sup>b</sup> and Lothar Stahl\*,<sup>a</sup>

<sup>a</sup> Department of Chemistry, University of North Dakota, Grand Forks, ND USA 58202

<sup>b</sup> Department of Chemistry, Purdue University, West Lafayette, IN USA 47907

E-mail: [lothar.stahl@und.edu](mailto:lothar.stahl@und.edu)

Phone: 1-701-777-2242

Fax: 1-701-777-2331

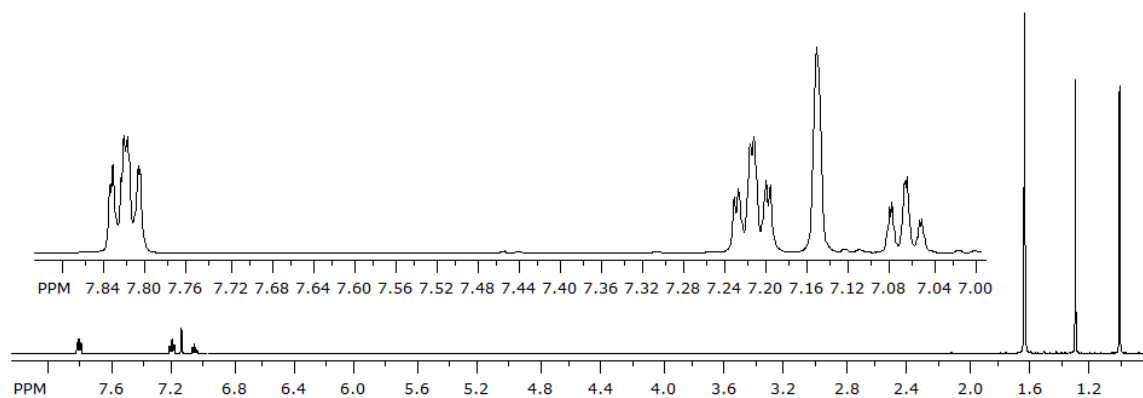

Fig. 1.  $^1\text{H}$  NMR spectrum of **1b**, benzene- $d_6$ .

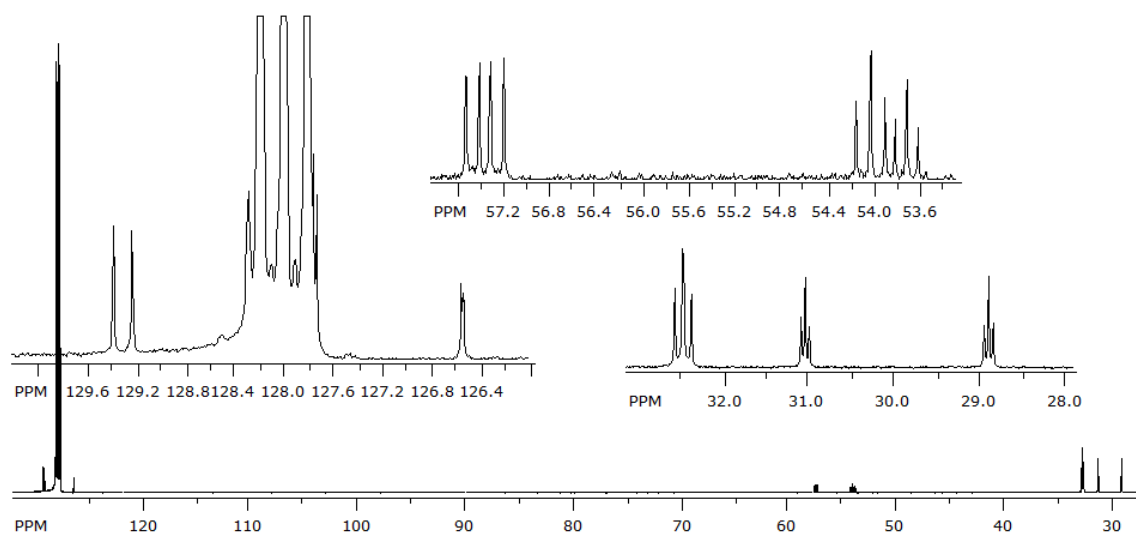

Fig. 2.  $^{13}\text{C}\{^1\text{H}\}$  NMR spectrum of **1b**, benzene- $d_6$ .

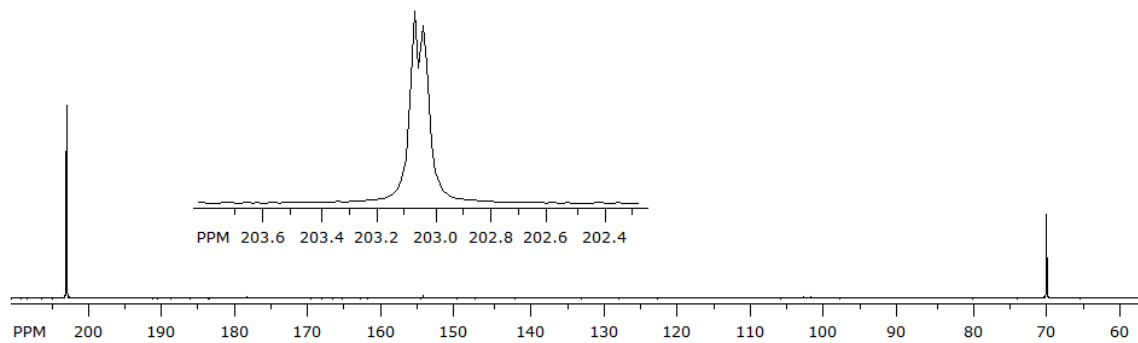

Fig. 3.  $^{31}\text{P}\{^1\text{H}\}$ NMR spectrum of **1b**, benzene- $\text{d}_6$ .

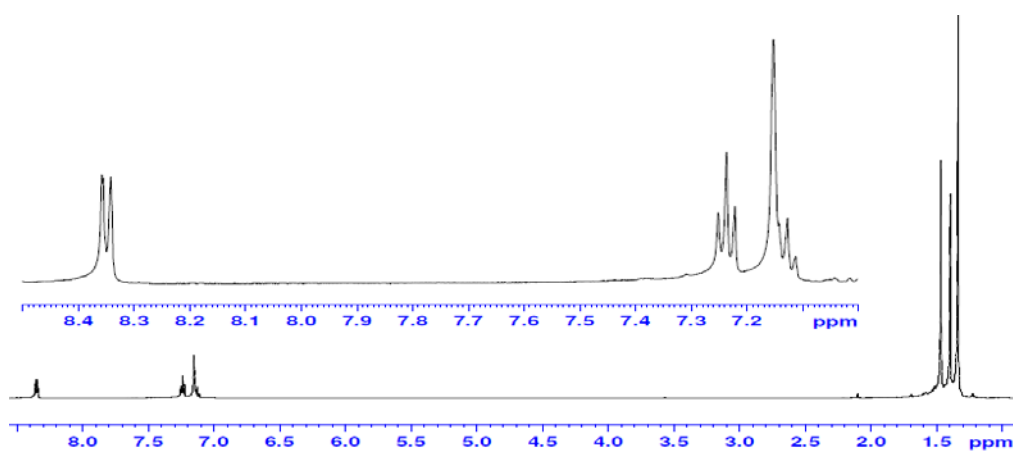

Figure 4.  $^1\text{H}$  NMR Spectrum of **2b**, benzene- $\text{d}_6$ .

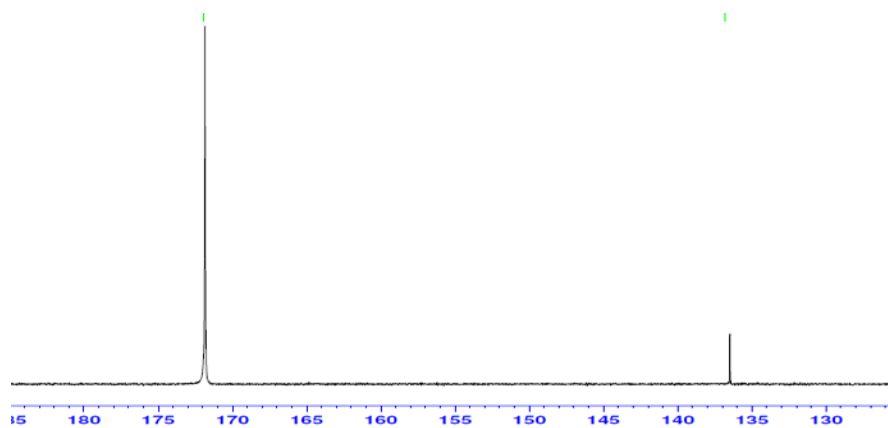

Figure 5.  $^{31}\text{P}\{^1\text{H}\}$  NMR Spectrum of **2b** benzene- $\text{d}_6$ , external reference at 137.0 ppm.

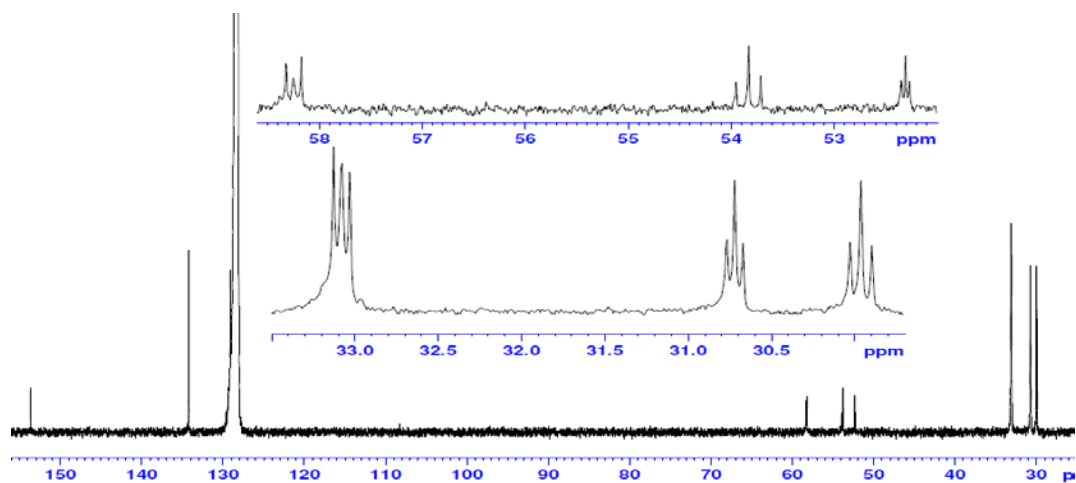

Figure 6.  $^{13}\text{C}\{^1\text{H}\}$  NMR Spectrum of **2b**, benzene- $\text{d}_6$ .

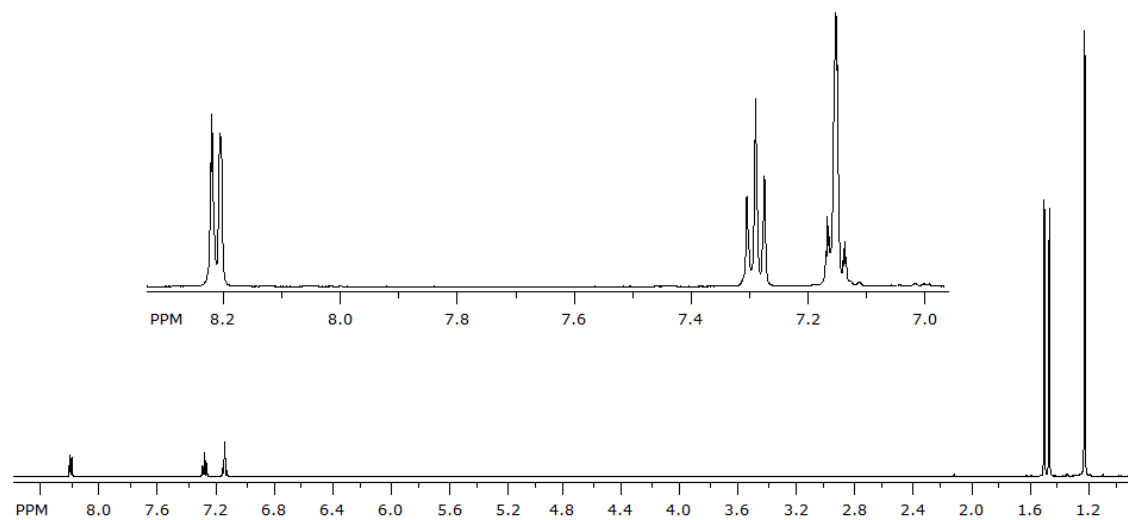

Fig. 7.  $^1\text{H}$  NMR Spectrum of **3b**, benzene- $\text{d}_6$ .

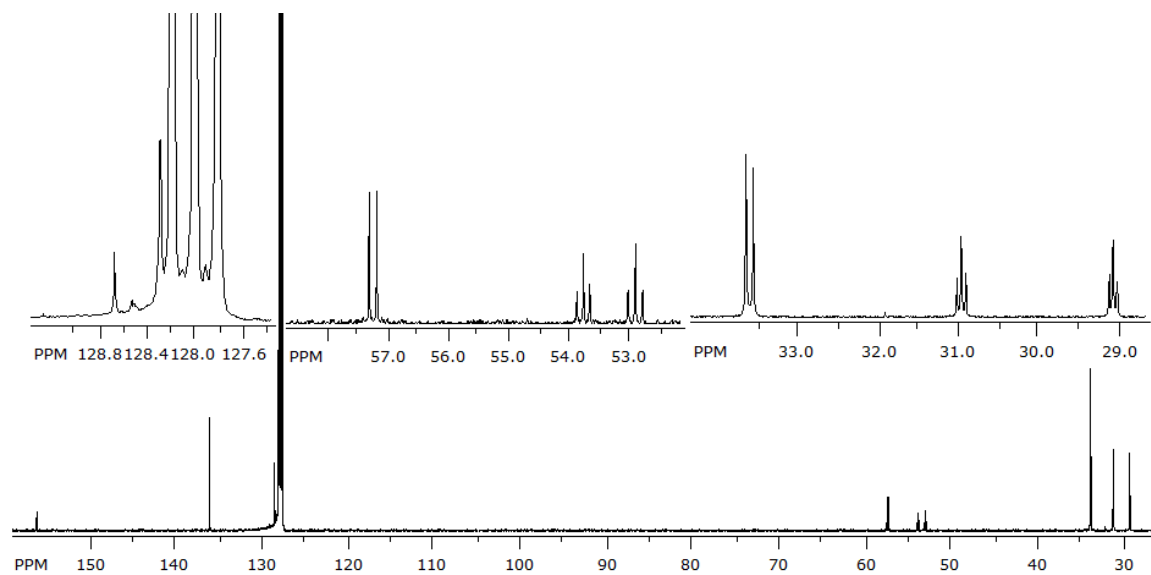

Fig. 8.  $^{13}\text{C}\{^1\text{H}\}$  NMR Spectrum of **3b**, benzene- $\text{d}_6$ .

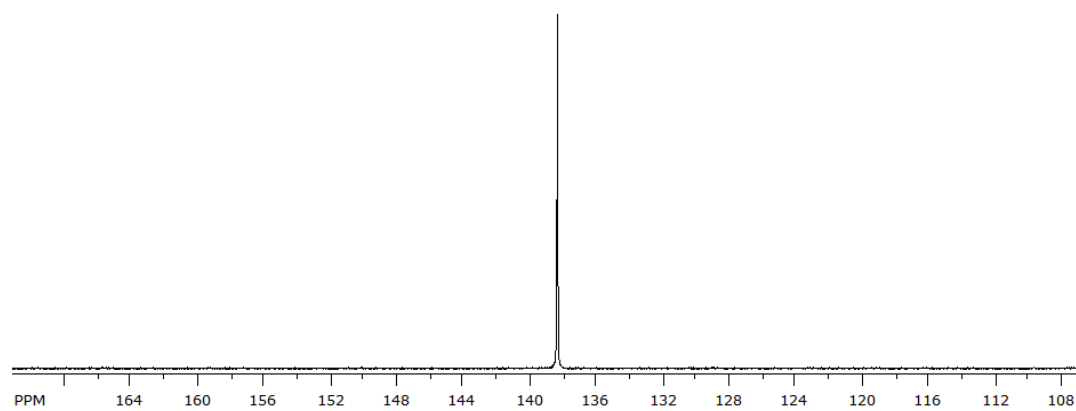

Fig. 9.  $^{31}\text{P}\{^1\text{H}\}$  NMR Spectrum of **3b**, benzene- $\text{d}_6$ .

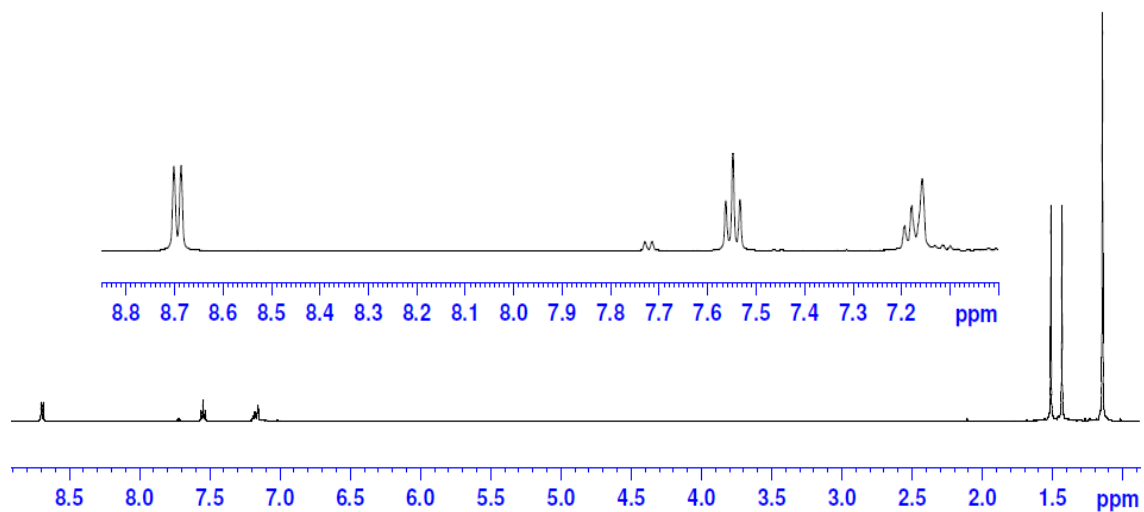

Figure 10.  $^1\text{H}$  NMR spectrum of **4b**, benzene- $\text{d}_6$ .

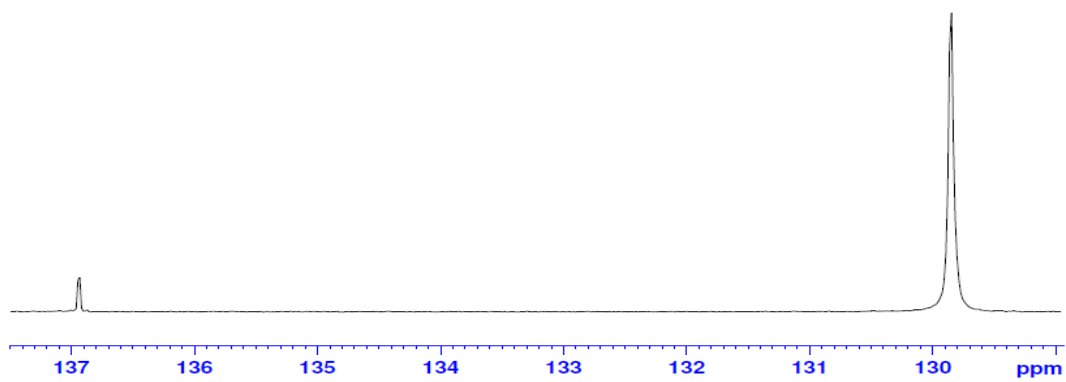

Figure 11.  $^{31}\text{P}\{^1\text{H}\}$  NMR spectrum of **4b**, benzene- $\text{d}_6$ , external reference at 137.0 ppm.

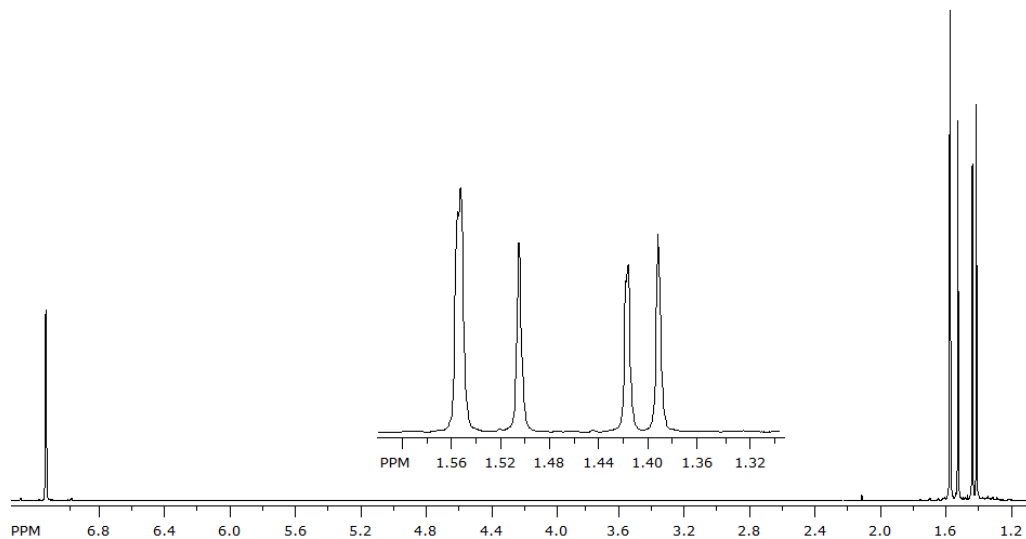

Fig. 12.  $^1\text{H}$  NMR spectrum of **1e**, benzene- $\text{d}_6$ .

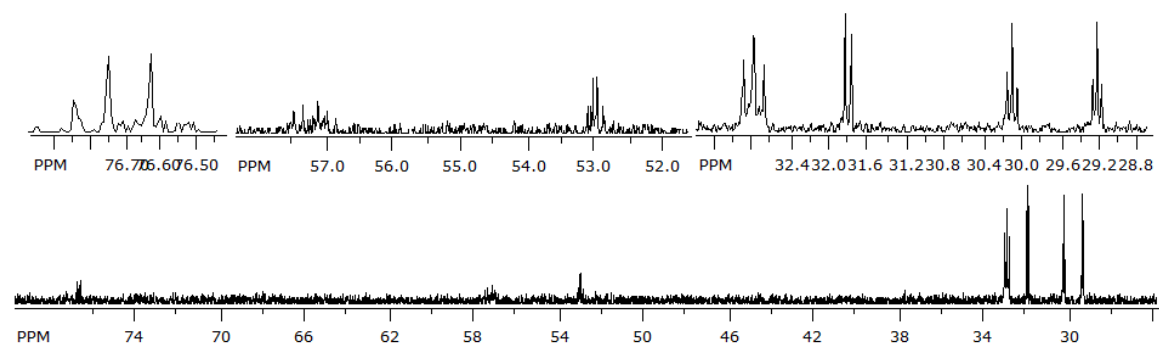

Fig. 13.  $^{13}\text{C}\{^1\text{H}\}$  NMR spectrum of **1e**, benzene- $\text{d}_6$ .

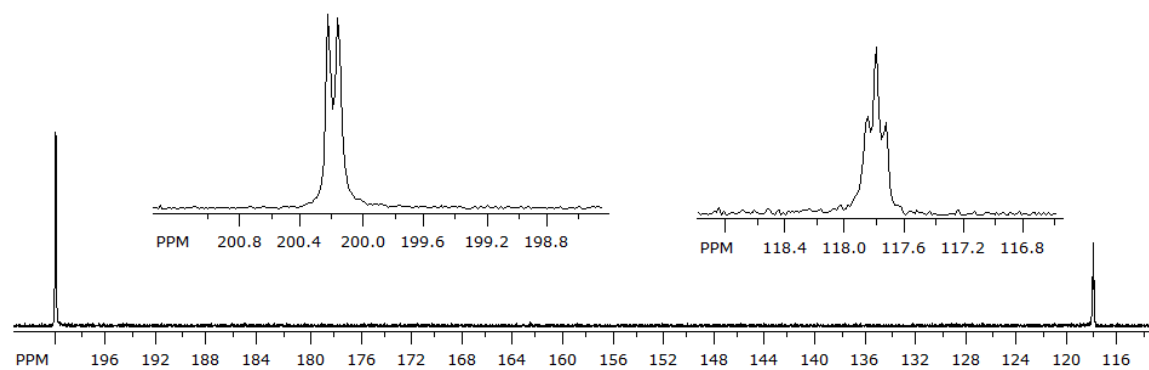

Fig. 14.  $^{31}\text{P}\{^1\text{H}\}$  NMR spectrum of **1e**, benzene- $\text{d}_6$ .

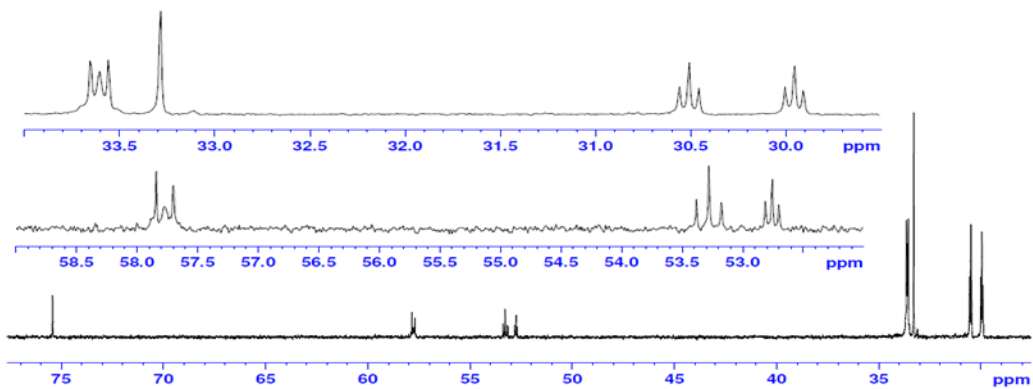

Fig. 15.  $^{13}\text{C}\{^1\text{H}\}$  NMR spectrum of **2e**, benzene- $\text{d}_6$ .

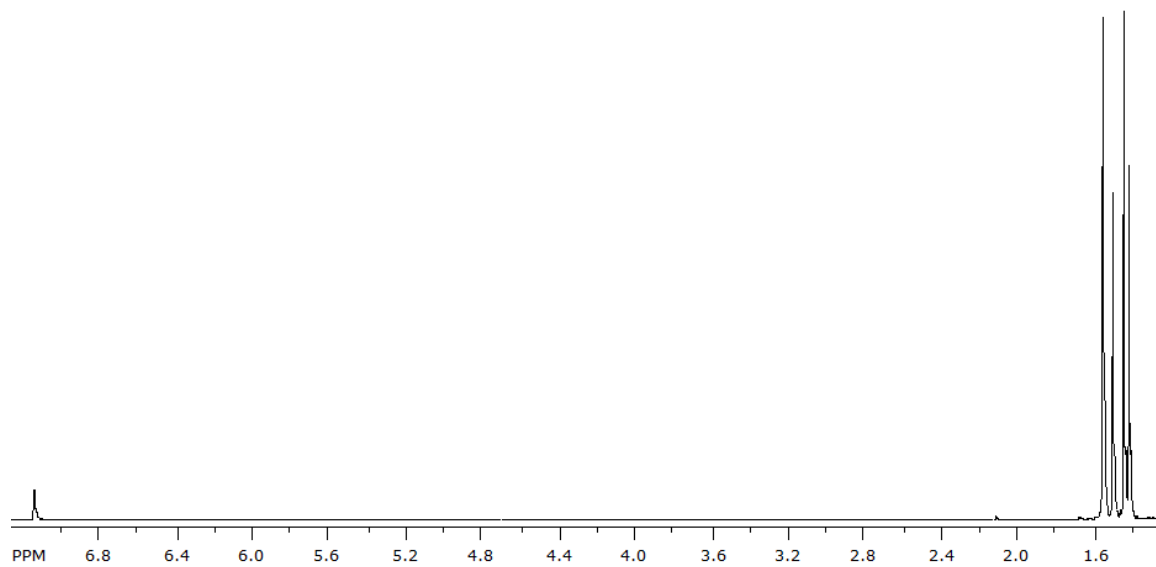

Fig. 16.  $^1\text{H}$  NMR spectrum of **3e**, benzene- $\text{d}_6$ .



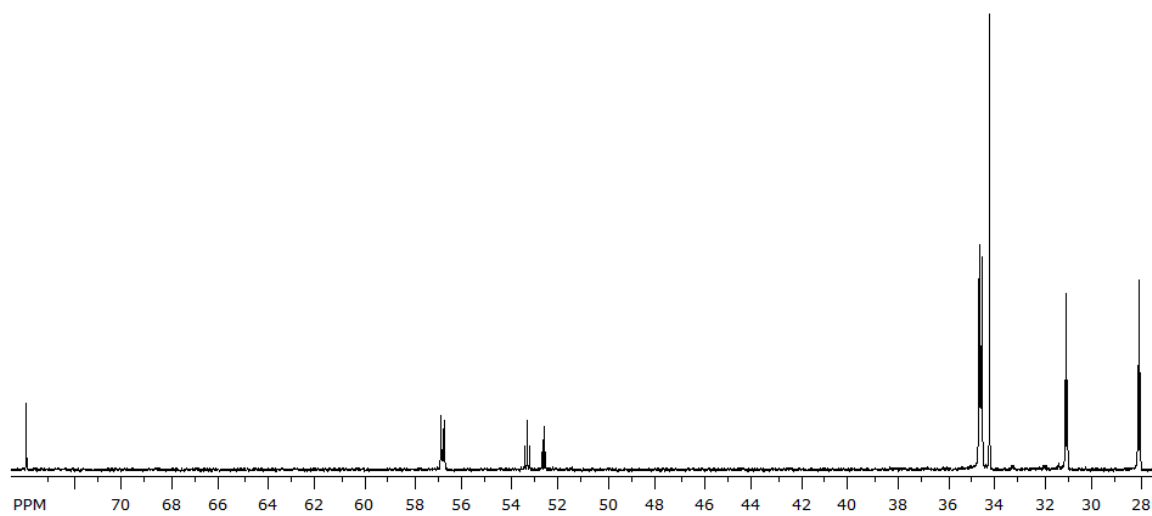

Fig. 17.  $^{13}\text{C}\{^1\text{H}\}$  NMR spectrum of **3e**, benzene- $\text{d}_6$ .

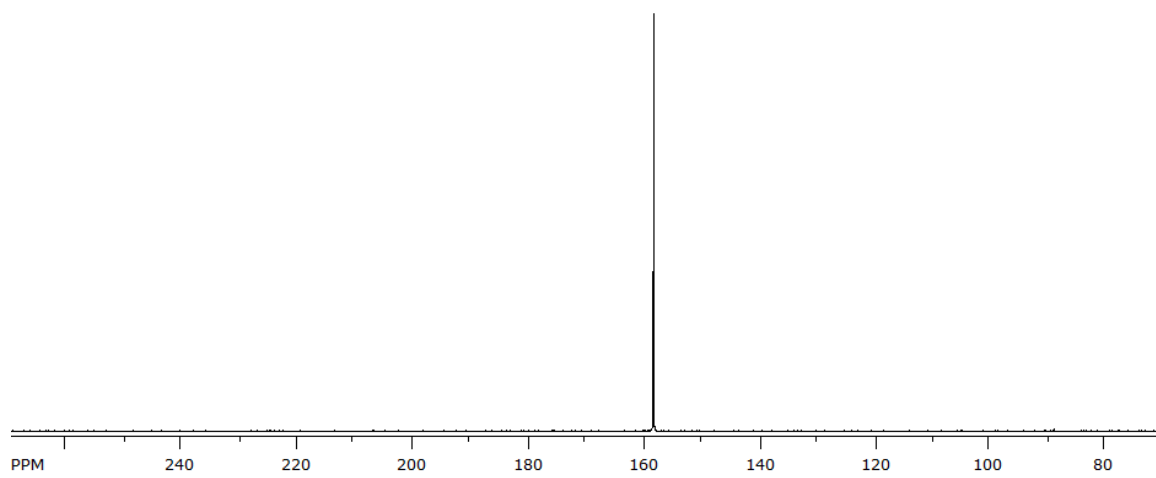

Fig. 18.  $^{31}\text{P}\{^1\text{H}\}$  NMR spectrum of **3e**, benzene- $\text{d}_6$ .

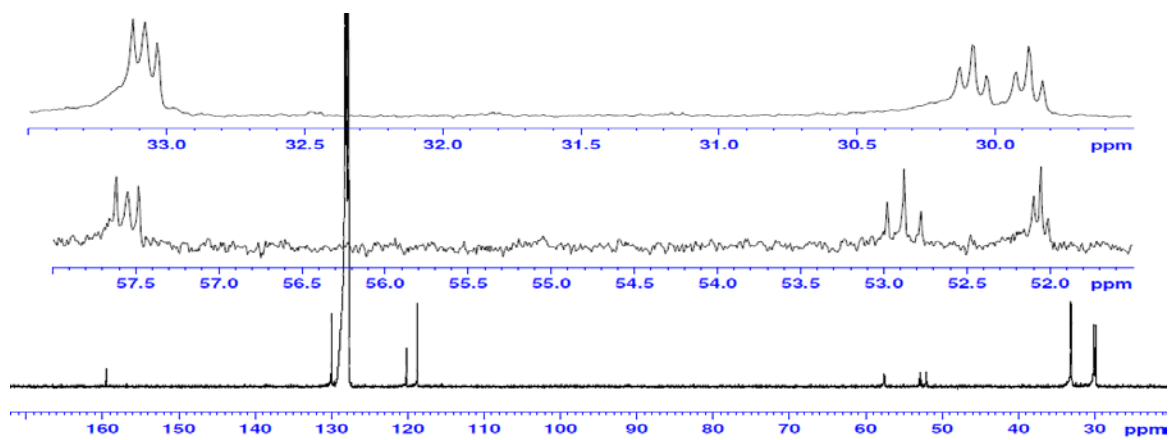

Fig. 19.  $^{13}\text{C}\{^1\text{H}\}$  NMR spectrum of **2f**, benzene- $\text{d}_6$ .

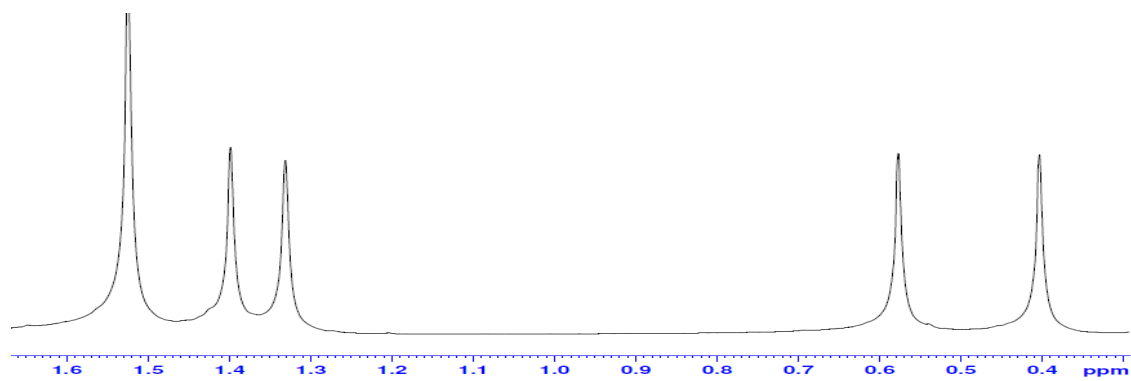

Fig. 20.  $^1\text{H}$  NMR spectrum of **2d**, benzene- $\text{d}_6$ .

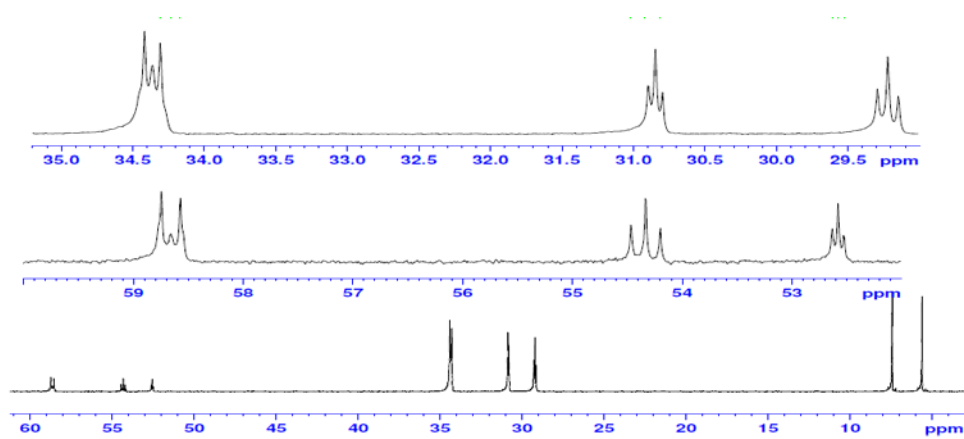

Fig. 21.  $^{13}\text{C}$ ( $^1\text{H}$ ) NMR spectrum of **2d**, benzene- $\text{d}_6$ .

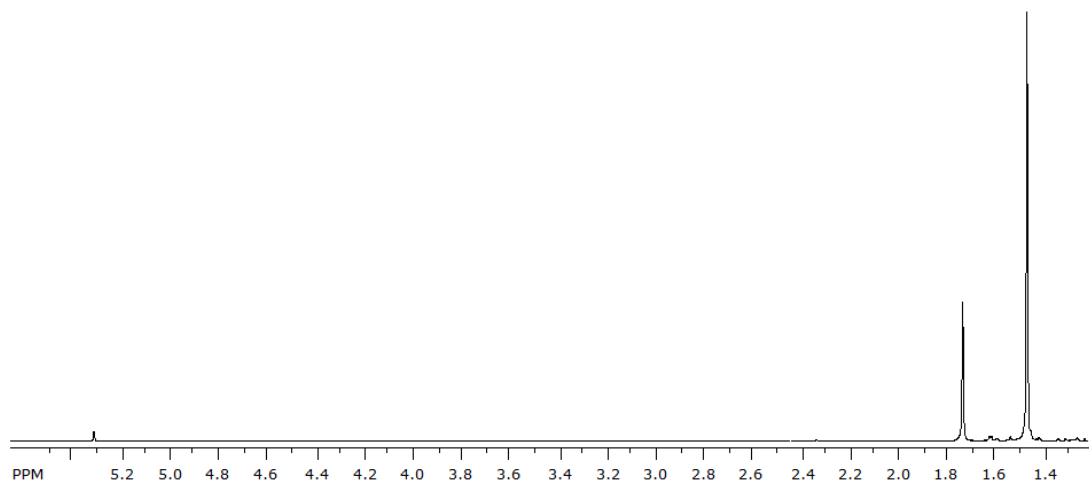

Fig. 22.  $^1\text{H}$  NMR spectrum of **1g**,  $\text{CD}_2\text{Cl}_2$ .

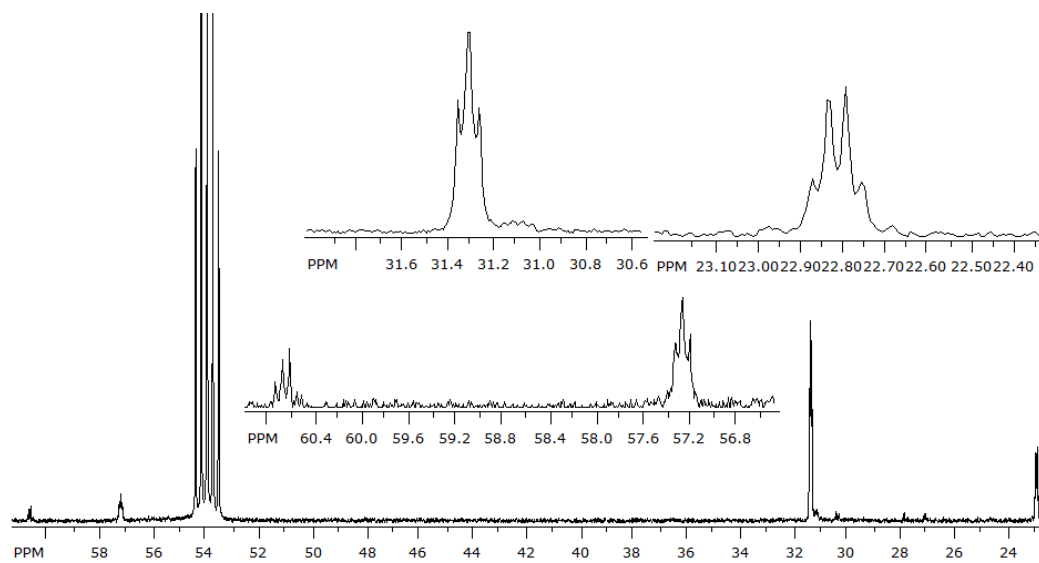

Fig. 23.  $^{13}\text{C}\{^1\text{H}\}$  NMR spectrum of **1g**,  $\text{CD}_2\text{Cl}_2$ .

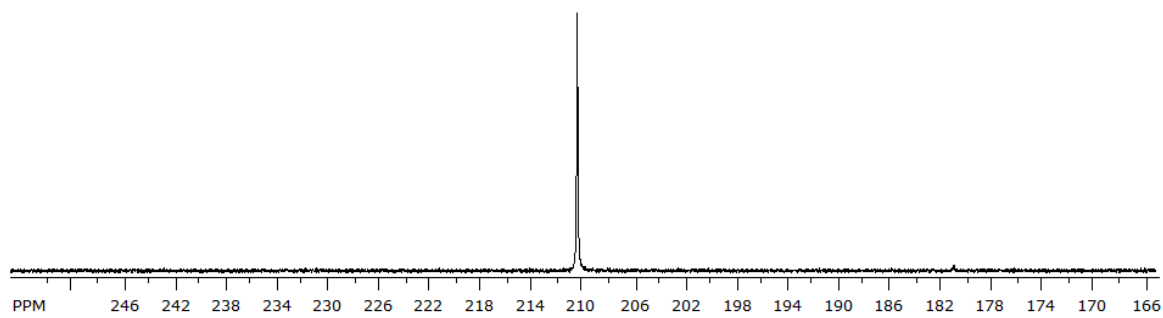

Fig. 24.  $^{31}\text{P}\{^1\text{H}\}$  NMR spectrum of **1g**,  $\text{CD}_2\text{Cl}_2$ .

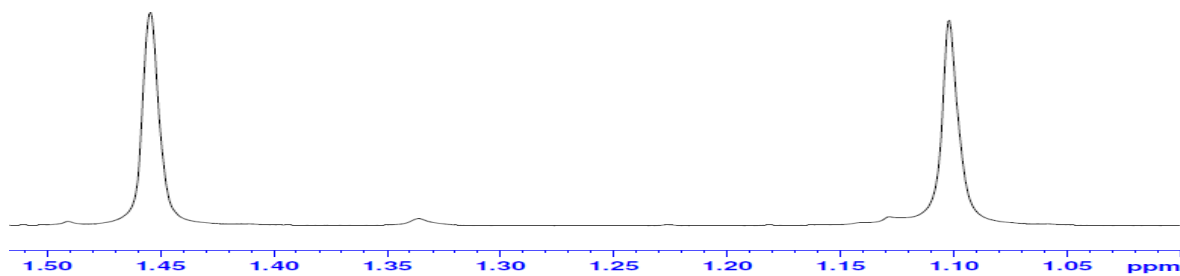

Fig. 25.  $^1\text{H}$  NMR spectrum of **3g**,  $\text{CD}_2\text{Cl}_2$ .

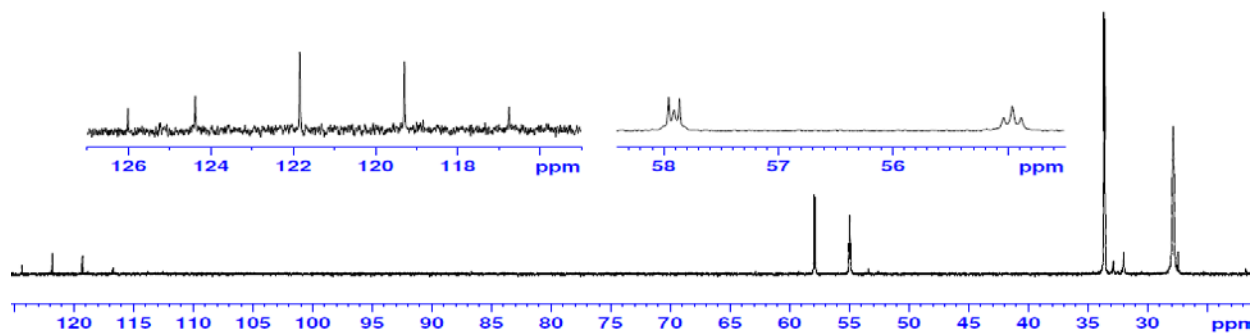

Fig. 26.  $^{13}\text{C}\{^1\text{H}\}$  NMR spectrum of **3g**,  $\text{CD}_2\text{Cl}_2$ .

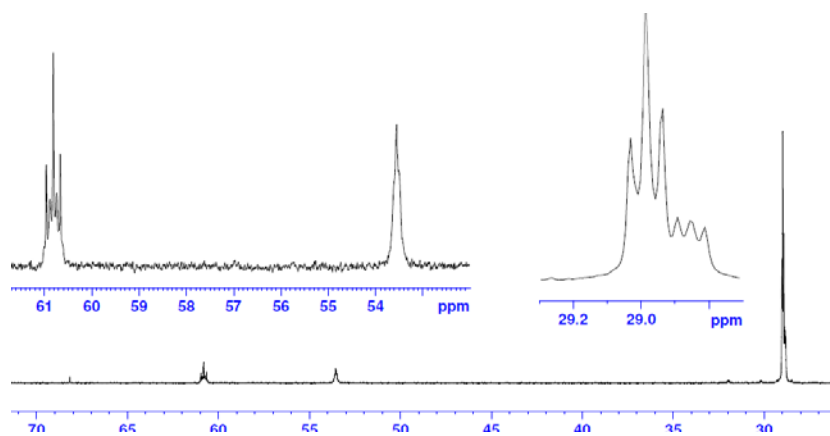

Fig. 27.  $^{13}\text{C}\{^1\text{H}\}$  NMR spectrum of **1h**, benzene- $d_6$ .

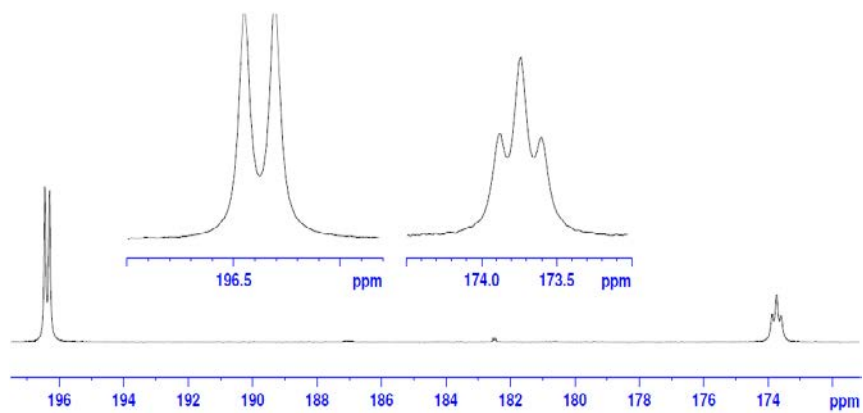

Fig. 28.  $^{31}\text{P}\{^1\text{H}\}$  NMR spectrum of **1h**, benzene- $\text{d}_6$ .
